# Supplementary material for: Association of Social-Cognitive Factors with Individual Preventive Behaviors of COVID-19 among a Mixed-Sample of Older Adults from China and Germany
Source: MDPI journal article supplement (doi:10.3390/ijerph19116364), 2022-05-24
Supplement: s1 [file s1]

**Table S1.** Results of univariate regressions between motivational factors, volitional factors and preventive behaviors (n = 560–578).

|                             | Hand Washing       |                   | Facemask Wearing     |                   | Physical Distancing |                   |
|-----------------------------|--------------------|-------------------|----------------------|-------------------|---------------------|-------------------|
|                             | B [95%CI]          | $\beta$ ( $f^2$ ) | B [95%CI]            | $\beta$ ( $f^2$ ) | B [95%CI]           | $\beta$ ( $f^2$ ) |
| <b>Motivational factors</b> |                    |                   |                      |                   |                     |                   |
| Health knowledge            | 0.16 [0.10, 0.22]  | 0.18 (0.03) ***   | −0.002 [−0.05, 0.05] | −0.003 (0.003)    | 0.06 [0.01, 0.10]   | 0.11 (0.01) *     |
| Attitude                    | 0.15 [0.10, 0.19]  | 0.23 (0.04) ***   | 0.13 [0.08, 0.17]    | 0.25 (0.06) ***   | 0.15 [0.10, 0.19]   | 0.27 (0.07) ***   |
| Subjective norm             | 0.14 [0.09, 0.19]  | 0.19 (0.03) ***   | 0.16 [0.11, 0.21]    | 0.28 (0.08) ***   | 0.14 [0.09, 0.19]   | 0.23 (0.05) ***   |
| Risk perception             | 0.02 [−0.01, 0.05] | 0.05 (0.002)      | 0.05 [0.01, 0.08]    | 0.12 (0.01) **    | 0.03 [0.004, 0.06]  | 0.09 (0.01) *     |
| Motivational self-efficacy  | 0.11 [0.06, 0.15]  | 0.17 (0.02) ***   | 0.24 [0.19, 0.29]    | 0.35 (0.14) ***   | 0.15 [0.11, 0.19]   | 0.29 (0.08) ***   |
| Intention                   | 0.21 [0.16, 0.27]  | 0.27 (0.06) ***   | 0.14 [0.09, 0.18]    | 0.25 (0.06) ***   | 0.22 [0.18, 0.27]   | 0.37 (0.13) ***   |
| <b>Volitional factors</b>   |                    |                   |                      |                   |                     |                   |
| Volitional self-efficacy    | 0.14 [0.10, 0.19]  | 0.23 (0.05) ***   | 0.21 [0.16, 0.26]    | 0.36 (0.14) ***   | 0.23 [0.19, 0.28]   | 0.40 (0.17) ***   |
| Planning                    | 0.17 [0.13, 0.21]  | 0.32 (0.08) ***   | 0.18 [0.14, 0.22]    | 0.34 (0.11) ***   | 0.16 [0.12, 0.20]   | 0.33 (0.10) ***   |
| Self-monitoring             | 0.13 [0.09, 0.16]  | 0.26 (0.05) ***   | 0.21 [0.16, 0.25]    | 0.36 (0.14) ***   | 0.12 [0.08, 0.16]   | 0.27 (0.06) ***   |

\*\*\*  $p < 0.001$ ; \*\*  $p < 0.01$ ; \*  $p < 0.05$ .
